# Supplementary material for: Mutated PET117 causes complex IV deficiency and is associated with neurodevelopmental regression and medulla oblongata lesions
Source: PubMed Central journal article supplement (PMC5429353; doi:10.1007/s00439-017-1794-7), 2017-04-06
Supplement: 439_2017_1794_MOESM1_ESM.pdf [file 439_2017_1794_MOESM1_ESM.pdf]

Supplementary Table 1: Whole exome sequencing results.

a

shared compound heterozygous variants

| Gene name | Chromosome | Genomic position (hg19) | Gene id   | variant   | zygosity       | protein      | dbSNP v.137 |             |          |       |      |          |        |                |        |                                                | OMIM | Disease (based on OMIM) | Selection criteria |
|-----------|------------|-------------------------|-----------|-----------|----------------|--------------|-------------|-------------|----------|-------|------|----------|--------|----------------|--------|------------------------------------------------|------|-------------------------|--------------------|
|           |            |                         |           |           |                |              | freq (%)    | RS          | ExAC (%) | Align | SIFT | Polyphen | phyloP | Grantham Score |        |                                                |      |                         |                    |
| ARHGAP31  | chr3       | g.119120744C>T          | NM_020754 | c.1145C>T | H <sub>z</sub> | p.Ser382Phe  | 0           | rs370215363 | 0,007    | CO    | 0,02 | 0,087    | 1,985  | 155            | 610911 | Adams-Oliver syndrome 1                        | a, b |                         |                    |
| ARHGAP31  | chr3       | g.119133120C>A          | NM_020754 | c.2344C>A | H <sub>z</sub> | p.Pro782Thr  | 0,05        | rs139659618 | 0,04     | CO    | 0,30 | 0,001    | 0,566  | 38             | 610911 | Adams-Oliver syndrome 1                        | a, b |                         |                    |
| PRUNE2    | chr9       | g.79318820T>G           | NM_015225 | c.7709A>G | H <sub>z</sub> | p.Glu2570Ala | 0,37        | rs140137838 | 0,26     | CO    | 0,38 | 0,265    | 0,305  | 107            | 610691 |                                                | a    |                         |                    |
| PRUNE2    | chr9       | g.79322539T>C           | NM_015225 | c.4651A>G | H <sub>z</sub> | p.Asn1551Asp | 0,09        | rs186649425 | 0,04     | CO    | 0,78 | 0,004    | 0,124  | 23             | 610691 |                                                | a    |                         |                    |
| ANKK1     | chr11      | g.113270015G>T          | NM_178510 | c.1324G>T | H <sub>z</sub> | p.Gly442Cys  | 0           | rs4938016   | 0,23     | CO    | 0,02 | 0,000    | 0,274  | 159            | 608774 | Dopamine receptor D2, reduced brain density of | a    |                         |                    |
| ANKK1     | chr11      | g.113270478C>T          | NM_178510 | c.1787C>T | H <sub>z</sub> | p.Pro596Leu  | 0,23        | rs7104979   | 0,27     | C65   | 0,00 | 0,968    | 2,659  | 98             | 608774 | Dopamine receptor D2, reduced brain density of | a    |                         |                    |
| ALDH3B2   | chr11      | g.67432798C>T           | NM_000695 | c.664G>A  | H <sub>z</sub> | p.Val222Met  | 0,37        | rs113012592 | 0,13     | CO    | 0,04 | 0,909    | 2,687  | 21             | 601917 |                                                | a    |                         |                    |
| ALDH3B2   | chr11      | g.67433023C>T           | NM_000695 | c.439G>A  | H <sub>z</sub> | p.Val147Met  | 0,41        | rs148026822 | 0,13     | CO    | 0,03 | 0,079    | 1,777  | 21             | 601917 |                                                | a    |                         |                    |
| OR3A1     | chr17      | g.3195336A>G            | NM_002550 | c.541T>C  | H <sub>z</sub> | p.Tyr181His  | 0,46        | rs61734042  | 0,27     | CO    | 0,00 | 0,996    | 2,201  | 83             | n.a.   |                                                | d    |                         |                    |
| OR3A1     | chr17      | g.3195353T>C            | NM_002550 | c.524A>G  | H <sub>z</sub> | p.Asn175Ser  | 0,46        | rs61734043  | 0,27     | CO    | 0,00 | 0,126    | 0,285  | 46             | n.a.   |                                                | a, d |                         |                    |
| BZRAP1    | chr17      | g.56386084T>A           | NM_004758 | c.4549A>T | H <sub>z</sub> | p.Thr1517Ser | 0,09        | rs147085967 | 0,08     | CO    | 0,97 | 0,005    | 0,482  | 58             | 610764 |                                                | a    |                         |                    |
| BZRAP1    | chr17      | g.56405103C>T           | NM_004758 | c.179G>A  | H <sub>z</sub> | p.Ser60Asn   | 0,09        | rs146385838 | 0,08     | CO    | 0,00 | 0,679    | 0,764  | 46             | 610764 |                                                | a    |                         |                    |

b

shared homozygous variants

| Gene name | Chromosome | Genomic position (hg19) | Gene id      | variant   | zygosity | protein      | dbSNP v.137 |             |          |       |      |          |        |                |        |                                                             | OMIM | Disease (based on OMIM) | Selection criteria |
|-----------|------------|-------------------------|--------------|-----------|----------|--------------|-------------|-------------|----------|-------|------|----------|--------|----------------|--------|-------------------------------------------------------------|------|-------------------------|--------------------|
|           |            |                         |              |           |          |              | freq (%)    | RS          | ExAC (%) | Align | SIFT | Polyphen | phyloP | Grantham Score |        |                                                             |      |                         |                    |
| TTLL10    | chr1       | g.1115510C>T            | NM_001130045 | c.296C>T  | Ho       | p.Pro99Leu   | 0,23        | rs114359609 | 0,24     | CO    | 0,31 | 0,001    | -0,765 | 98             | n.a.   |                                                             | a    |                         |                    |
| SCNN1D    | chr1       | g.1222657G>A            | NM_001130413 | c.1288G>A | Ho       | p.Asp430Asn  | 0           | rs140170231 | 0,31     | CO    | 0,73 | 0,013    | 0,270  | 23             | 601328 |                                                             | a    |                         |                    |
| SCNN1D    | chr1       | g.12226311C>T           | NM_001130413 | c.1954C>T | Ho       | p.Pro652Ser  | 0           | rs113608779 | 0,08     | CO    | 0,42 | 0,002    | -0,155 | 74             | 601328 |                                                             | a    |                         |                    |
| ANKRD65   | chr1       | g.1354495T>C            | NM_001145210 | c.1185A>G | Ho       | p.Ile395Met  | 0,37        | rs141533546 | 0,38     | CO    | 0,15 | 0,029    | -0,356 | 10             | n.a.   |                                                             | a    |                         |                    |
| ITPKB     | chr1       | g.226923391C>T          | NM_002221    | c.1769G>A | Ho       | p.Arg590Gln  | 0           | rs774932416 | 0,003    | CO    | 0,00 | 0,006    | -1,112 | 43             | 147522 |                                                             | a    |                         |                    |
| AGRN      | chr1       | g.981801C>T             | NM_198576    | c.293C>T  | Ho       | p.Pro979Leu  | 0           | rs562644551 | 0,005    | CO    | 0,03 | 0,975    | 0,921  | 98             | 103320 | Myasthenic syndrome, congenital, with pre- and postsynaptic | a, b |                         |                    |
| LAMA4     | chr6       | g.112575200G>T          | NM_001105206 | c.153C>A  | Ho       | p.Ser51Arg   | 0           | rs782192817 | 0,002    | CO    | 0,00 | 0,001    | 0,585  | 110            | 600133 | Cardiomyopathy, dilated, 1J1                                | a, b |                         |                    |
| CSPP1     | chr8       | g.68074097A>C           | NM_024790    | c.2575A>C | Ho       | p.Ser859Arg  | 0,14        | rs201259375 | 0,050    | CO    | 0,42 | 0,018    | 0,622  | 110            | 611654 | Joubert syndrome 21                                         | a, b |                         |                    |
| EVPL      | chr17      | g.74003216C>T           | NM_001988    | c.6070G>A | Ho       | p.Ala2024Thr | 0           | rs149512337 | 0,06     | CO    | 0,10 | 0,129    | 1,263  | 58             | 601590 |                                                             | a, d |                         |                    |
| EVPL      | chr17      | g.74004307C>T           | NM_001988    | c.4979G>A | Ho       | p.Arg1660Gln | 0           | rs199686324 | 0,05     | CO    | 0,29 | 0,571    | 4,088  | 43             | 601590 |                                                             | a, d |                         |                    |
| EVPL      | chr17      | g.74004600C>A           | NM_001988    | c.4686G>T | Ho       | p.Glu1562Asp | 0           | rs113394630 | 0,07     | CO    | 0,55 | 0,003    | 0,409  | 45             | 601590 |                                                             | a, d |                         |                    |
| EVPL      | chr17      | g.74004928G>A           | NM_001988    | c.4358C>T | Ho       | p.Pro1453Leu | 0,05        | rs113135904 | 0,06     | CO    | 0,00 | 0,989    | 4,061  | 98             | 601590 |                                                             | d    |                         |                    |
| EVPL      | chr17      | g.74007865G>C           | NM_001988    | c.2556C>G | Ho       | p.Ser852Arg  | 0           | rs141134319 | 0,06     | CO    | 0,02 | 0,391    | 1,734  | 110            | 601590 |                                                             | a    |                         |                    |
| PET117    | chr20      | g.18122927C>T           | NM_001164811 | c.172C>T  | Ho       | p.Gln58*     | 0           | -           | 0,00     | n.a.  | n.a. | n.a.     | 4,617  | 1000           | 614771 |                                                             | a    |                         |                    |
| ASXL1     | chr20      | g.31023964G>T           | NM_015338    | c.3449G>T | Ho       | p.Gly1150Val | 0           | rs773823004 | 0,002    | CO    | 0,34 | 0,017    | 0,332  | 109            | 612990 | Bohring-Opitz syndrome; Myelodysplastic syndrome            | a, b |                         |                    |

c

shared Mitocarta2.0 variants

| Gene name | Chromosome | Genomic position (hg19) | Gene id      | variant    | zygosity | protein     | dbSNP v.137 |             |          |       |      |          |        |                |        |  | OMIM | Disease (based on OMIM) | Selection criteria |
|-----------|------------|-------------------------|--------------|------------|----------|-------------|-------------|-------------|----------|-------|------|----------|--------|----------------|--------|--|------|-------------------------|--------------------|
|           |            |                         |              |            |          |             | freq (%)    | RS          | ExAC (%) | Align | SIFT | Polyphen | phyloP | Grantham Score |        |  |      |                         |                    |
| ALDH18A1  | chr10      | g.97370014T>C           | NM_002860    | c.2146A>G  | He       | p.Ser716Gly | 0           | -           | 0        | C55   | 0    | 0,999    | 4,619  | 56             | 138250 |  | c    |                         |                    |
| HEMK1     | chr3       | g.50616356A>C           | NM_016173    | c.769A>C   | He       | p.Ser257Arg | 0           | -           | 0        | CO    | 0,69 | 0,004    | 2,582  | 110            | n.a.   |  | a, c |                         |                    |
| MRPL23    | chr11      | g.1977627G>C            | NM_021134    | c.439G>C   | He       | p.Val147Leu | 0,05        | rs151012849 | 0,16     | CO    | 0,30 | 0,013    | 0,318  | 32             | 600789 |  | a, c |                         |                    |
| MSRA      | chr8       | g.9912075C>T            | NM_012331    | c.49C>T    | He       | p.Leu17Phe  | 0           | -           | 0        | CO    | 0,18 | 0,025    | -0,320 | 22             | n.a.   |  | a, c |                         |                    |
| MTRF1     | chr13      | g.41827127T>G           | NM_004294    | c.547A>G   | He       | p.Asn183Asp | 0           | -           | 0        | CO    | 0,37 | 0,138    | 2,684  | 68             | 604601 |  | a, c |                         |                    |
| NEU4      | chr2       | g.242757937C>G          | NM_001167599 | c.1057C>G  | He       | p.Arg353Gly | 0           | rs200439365 | 0,37     | CO    | 0,42 | 0,039    | -0,201 | 125            | 608527 |  | a, c |                         |                    |
| PET117    | chr20      | g.18122927C>T           | NM_001164811 | c.172C>T   | Ho       | p.Gln58*    | 0           | -           | 0,00     | n.a.  | n.a. | n.a.     | 4,617  | 1000           | 614771 |  | a    |                         |                    |
| SARS2     | chr19      | g.39412913A>G           | NM_017827    | c.364-6T>C | He       | p.?         | 0           | -           | 0        | §     | n.a. | n.a.     | -1,474 | 0              | 612804 |  | a, c |                         |                    |
